# Supplementary material for: Effect of a Novel Trivalent Vaccine Formulation against Acute Lung Injury Caused by Pseudomonas aeruginosa
Source: MDPI journal article supplement (doi:10.3390/vaccines11061088), 2023-06-11
Supplement: s1 [file s1]

**Table S1. PCR primer sets**

| PCR product                             | name                        | sequence                                                             |
|-----------------------------------------|-----------------------------|----------------------------------------------------------------------|
| PcrV                                    | PcrV5- <i>SphI</i>          | 5'- <u>G CAT GCG</u> AAA ATG GAA GTC AGA AA-3'                       |
|                                         | PcrV3- <i>HindIII</i>       | 5'- <u>A AGC TTG</u> cta GAT CGC GCT GAG AA-3'                       |
| OprF <sub>#190-#342</sub>               | OprF5-190- <i>SphI</i> -TG  | 5'- <u>G CAT GCG</u> AAG GCT CCG GCT CCG GAA CC-3'                   |
|                                         | OprF3-342- <i>HindIII</i>   | 5'- <u>AAG CTT</u> tta TTC AAC GCG ACG GTT GAT AG-3'                 |
| ToxA <sub>#406-#613(E553Δ)</sub>        | tox103_CT5- <i>SphI</i> _TG | 5'- <u>G CAT GCG</u> AAA GAC GTC AGC TTC AGC ACC-3'                  |
|                                         | toxCT_3- <i>HindIII</i>     | 5'- <u>AAG CTT</u> tta CTT CAG GTC CTC GCG-3'                        |
|                                         | toxA_D553                   | 5'- C GAG AAT GGT [ΔCTC] CAG GCG CCC GCC-3'                          |
| POmT                                    |                             |                                                                      |
| PcrV domain                             | PcrV5- <i>SphI</i>          | 5'- <u>G CAT GCG</u> AAA ATG GAA GTC AGA AA-3'                       |
|                                         | PcrV3 (no stop codon)       | 5'-GAT CGC GCT GAG AAT GTC GCG-3'                                    |
|                                         | PcrV3-GGGGS                 | 5'- <u>GGA TCC GCC ACC GCC</u> GAT CGC GCT GAG AAT GTC GCG-3'        |
| OprF <sub>#190-#342</sub> domain        | OprF190-5                   | 5'-GCT CCG GCT CCG GAA CCG-3'                                        |
|                                         | OprF342-3                   | 5'-C TTC AAC GCG ACG GTT GAT AGC GC-3'                               |
|                                         | OprF190-342-GGGGS-5         | 5'- <u>GGC GGT GGC GGA TCC</u> GCT CCG GCT CCG GAA CCG-3'            |
|                                         | OprF190-342-GSGGSG-3        | 5'- <u>ACC GGA ACC CCC TGA ACC</u> TTC AAC GCG ACG GTT GAT AGC GC-3' |
| ToxA <sub>#406-#613(E553Δ)</sub> domain | tox103_CT5                  | 5'-GAC GTC AGC TTC AGC ACC CGC G-3'                                  |
|                                         | tox103_CT5- GSGGSG          | 5'- <u>GGT TCA GGG GGT TCC GGT</u> GAC GTC AGC TTC AGC ACC CGC G-3'  |
|                                         | toxCT_3- <i>HindIII</i>     | 5'- <u>AAG CTT</u> tta CTT CAG GTC CTC GCG-3'                        |

PcrV, full-length PcrV; OprF, the outer membrane domain (#190–342) of OprF; mTOX, a non-catalytic mutated domain (#406–613, E553Δ) of exotoxin A; POmT, a conjugate of PcrV, and parts of OprF and mutated exotoxin A.
